# Supplementary material for: Obesity as a protective factor for cognitive function: a longitudinal study in a middle-aged and older Chinese adults
Source: Research Square preprint supplement (doi:10.21203/rs.3.rs-5311665/v1), 2024-12-04
Supplement: Supplementary file 1 [file 0b66d4634590ff332a65bfab.docx]

**Supplementary Data**

**Fixed model regression.** We did several ﬁxed regressions on cognitive function using panel data.

**Table S1. Analyses for association between BMI and cognition in 2011-2018**

|  | (1) | (2) | (3) | (4) | (5) | （6） |
| --- | --- | --- | --- | --- | --- | --- |
|  | General cognition | TICS | Episodic memory | Delayed recall | Immediate recall | Visuospatial ability |
| underweight | -0.644* | -0.284 | -0.044 | -0.049 | -0.003 | -0.088** |
|  | 0.344 | 0.220 | 0.145 | 0.168 | 0.141 | 0.039 |
| overweight | 0.501** | 0.239* | 0.208** | 0.214** | 0.172* | 0.012 |
|  | 0.215 | 0.142 | 0.091 | 0.108 | 0.089 | 0.025 |
| obesity | 0..698** | 0.297 | 0.154 | 0.140 | 0.071 | 0.024 |
|  | 0.324 | 0.212 | 0.137 | 0.161 | 0.133 | 0.037 |
| age | 0.234* | 0.330*** | -0.022 | -0.073 | 0.006 | -0.008 |
|  | 0.120 | 0.073 | 0.047 | 0.056 | 0.046 | 0.014 |
| age2 | -0.271*** | -0.314*** | -0.034 | -0.001 | -0.052 | -0.001 |
|  | 0.097 | 0.058 | 0.038 | 0.044 | 0.037 | 0.011 |
| male | 1.834*** | 1.46*** | 0.329*** | 0.322*** | 0.307*** | 0.199*** |
|  | 0.164 | 0.107 | 0.070 | 0.082 | 0.068 | 0.019 |
| hukou | -2.054*** | -1.406*** | -0.571*** | -0.698*** | -0.497*** | -0.158*** |
|  | 0.238 | 0.158 | 0.101 | 0.121 | 0.098 | 0.028 |
| marriage | 0.733*** | 0.99*** | 0.446*** | 0.375*** | 0.530*** | 0.036 |
|  | 0.229 | 0.204 | 0.094 | 0.109 | 0.091 | 0.026 |
| education | 1.758*** | 0.203*** | 0.934*** | 1.109*** | 0.807*** | 0.160*** |
|  | 0.287 | 0.033 | 0.127 | 0.155 | 0.124 | 0.034 |
| log(total household income) | 0.298*** | -0.137*** | 0.113*** | 0.11*** | 0.114*** | 0.018*** |
|  | 0.051 | 0.033 | 0.022 | 0.025 | 0.021 | 0.006 |
| household size | -0.231*** | -0.003 | -0.095*** | -0.079*** | -0.099*** | -0.012** |
|  | 0.051 | 0.040 | 0.022 | 0.025 | 0.021 | 0.006 |
| child number | -0.085 | -0.006* | -0.041 | -0.045 | -0.02 | -0.009 |
|  | 0.064 | 0.004 | 0.027 | 0.031 | 0.026 | 0.007 |
| systolic blood | -0.009 | -0.004 | -0.005** | -0.007*** | -0.003 | 0.000 |
|  | 0.006 | 0.007 | 0.002 | 0.003 | 0.002 | 0.001 |
| diastolic blood | -0.001 | 0.015** | 0.004 | 0.008 | 0.002 | 0.000 |
|  | 0.010 | 0.008 | 0.004 | 0.005 | 0.004 | 0.001 |
| waist | 0.009 | -0.251 | 0.004 | 0.004 | 0.007 | 0.000 |
|  | 0.011 | 0.202 | 0.005 | 0.006 | 0.005 | 0.001 |
| disability | -0.326 | 0.003** | -0.317** | -0.301* | -0.350*** | 0.016 |
|  | 0.318 | 0.001 | 0.130 | 0.154 | 0.127 | 0.037 |
| Triglycerides | 0.004** | -0.010** | 0.001 | 0.001 | 0.001 | 0.000** |
|  | 0.002 | 0.005 | 0.001 | 0.001 | 0.001 | 0.000 |
| Total Cholesterol | -0.014* | 0.028 | -0.003 | -0.006 | -0.002 | -0.002** |
|  | 0.007 | 0.056 | 0.003 | 0.004 | 0.003 | 0.001 |
| Glycated Hemoglobin | 0.086 | 0.008 | 0.008 | 0.023 | -0.012 | -0.009 |
|  | 0.087 | 0.006 | 0.036 | 0.043 | 0.034 | 0.010 |
| High Density Lipoprotein Cholesterol | 0.005 | 0.010* | -0.001 | 0.002 | -0.002 | 0.000 |
|  | 0.009 | 0.005 | 0.004 | 0.005 | 0.004 | 0.001 |
| Low Density Lipoprotein Cholesterol | 0.013* | -0.284 | 0.002 | 0.005 | 0.001 | 0.002* |
|  | 0.008 | 0.220 | 0.003 | 0.004 | 0.003 | 0.001 |
| Year | Yes | Yes | Yes | Yes | Yes | Yes |
| _cons | 3.019 | -4.461* | 4.408*** | 5.74*** | 3.433** | 1.037** |
|  | 3.911 | 2.433 | 1.575 | 1.856 | 1.532 | 0.449 |
| Observations | 2626 | 3257 | 2935 | 3224 | 2968 | 2857 |
| R-squared | 0.199 | 0.182 | 0.196 | 0.159 | 0.247 | 0.115 |

*Notes:*Standard errors are in parentheses. *** p<0.01, ** p<0.05, * p<0.1.

**Sensitive analysis.** In order to make the results more robust, we remove the year 2015 without the blood indicators and divide the original panel data into two cross-sectional data for separate OLS regressions.

**Table S2. Sensitivity analyses for association between BMI and cognition in 2011-2013**

|  | (1) | (2) | (3) | (4) | (5) | （6） |
| --- | --- | --- | --- | --- | --- | --- |
|  | General cognition | TICS | Episodic memory | Delayed recall | Immediate recall | Visuospatial ability |
| underweight | -0.602 | -0.154 | -0.165 | -0.230 | -0.072 | -0.071 |
|  | 0.412 | 0.283 | 0.166 | 0.183 | 0.175 | 0.047 |
| overweight | 0.396 | 0.193 | 0.103 | 0.101 | 0.071 | 0.005 |
|  | 0.260 | 0.186 | 0.105 | 0.120 | 0.110 | 0.031 |
| obesity | 0.459 | 0.331 | 0.020 | 0.021 | -0.005 | -0.002 |
|  | 0.382 | 0.271 | 0.154 | 0.175 | 0.162 | 0.045 |
| age | 0.309** | 0.288*** | 0.020 | -0.062 | 0.093 | -0.009 |
|  | 0.140 | 0.097 | 0.057 | 0.063 | 0.060 | 0.016 |
| age2 | -0.352*** | -0.292*** | -0.070 | -0.008 | -0.128*** | 0.000 |
|  | -0.114 | 0.079 | 0.046 | 0.051 | 0.049 | 0.013 |
| male | 1.995*** | 1.525*** | 0.242*** | 0.163* | 0.273*** | 0.214*** |
|  | 0.199 | 0.141 | 0.080 | 0.091 | 0.085 | 0.023 |
| hukou | -2.024*** | -1.449*** | -0.602*** | -0.65*** | -0.618*** | -0.209*** |
|  | 0.306 | 0.222 | 0.124 | 0.143 | 0.130 | 0.037 |
| marriage | 0.543* | 0.252 | 0.331*** | 0.233* | 0.391*** | 0.043 |
|  | 0.281 | 0.192 | 0.112 | 0.124 | 0.118 | 0.032 |
| education | 1.688*** | 0.900*** | 0.673*** | 0.681*** | 0.701*** | 0.186*** |
|  | 0.388 | 0.287 | 0.158 | 0.186 | 0.166 | 0.047 |
| log(total household income) | 0.266*** | 0.193*** | 0.094*** | 0.087*** | 0.102*** | 0.007 |
|  | 0.063 | 0.044 | 0.026 | 0.028 | 0.027 | 0.007 |
| household size | -0.245*** | -0.167*** | -0.082*** | -0.068*** | -0.087*** | -0.009 |
|  | 0.057 | 0.040 | 0.023 | 0.026 | 0.024 | 0.007 |
| child number | -0.053 | -0.002 | 0.001 | -0.008 | 0.033 | -0.003 |
|  | 0.078 | 0.054 | 0.032 | 0.035 | 0.033 | 0.009 |
| systolic blood | 0.003 | 0.001 | 0.000 | -0.002 | 0.002 | -0.001 |
|  | 0.007 | 0.005 | 0.003 | 0.003 | 0.003 | 0.001 |
| diastolic blood | -0.020 | -0.017* | -0.002 | 0.005 | -0.006 | 0.001 |
|  | 0.013 | 0.009 | 0.005 | 0.006 | 0.005 | 0.001 |
| waist | 0.020 | 0.022** | 0.003 | 0.001 | 0.005 | 0.001 |
|  | 0.014 | 0.010 | 0.006 | 0.006 | 0.006 | 0.002 |
| disability | -0.019 | 0.270 | -0.208 | -0.117 | -0.319* | -0.006 |
|  | 0.387 | 0.282 | 0.157 | 0.183 | 0.166 | 0.047 |
| Triglycerides | 0.005** | 0.004** | 0.001 | 0.001 | 0.002* | 0.001** |
|  | 0.002 | 0.002 | 0.001 | 0.001 | 0.001 | 0.000 |
| Total Cholesterol | -0.02** | -0.015** | -0.005 | -0.005 | -0.006 | -0.003** |
|  | 0.009 | 0.006 | 0.004 | 0.004 | 0.004 | 0.001 |
| Glycated Hemoglobin | 0.113 | 0.087 | 0.029 | -0.010 | 0.054 | -0.007 |
|  | 0.116 | 0.083 | 0.047 | 0.053 | 0.049 | 0.014 |
| High Density Lipoprotein Cholesterol | 0.013 | 0.011 | 0.001 | 0.003 | 0.003 | 0.002 |
|  | 0.011 | 0.007 | 0.004 | 0.005 | 0.005 | 0.001 |
| Low Density Lipoprotein Cholesterol | 0.016* | 0.013** | 0.002 | 0.003 | 0.004 | 0.002** |
|  | 0.009 | 0.006 | 0.004 | 0.004 | 0.004 | 0.001 |
| _cons | 1.104 | -3.274 | 3.525* | 6.137*** | 1.084 | 1.069** |
|  | 4.548 | 3.177 | 1.844 | 2.055 | 1.941 | 0.533 |
| Observations | 1658 | 1904 | 1676 | 1904 | 1676 | 1833 |
| R-squared | 0.214 | 0.179 | 0.173 | 0.145 | 0.157 | 0.125 |

*Notes:*Standard errors are in parentheses. *** p<0.01, ** p<0.05, * p<0.1

**Table S3. Sensitivity analyses for association between BMI and cognition in 2015-2018**

|  | (1) | (2) | (3) | (4) | (5) | （6） |
| --- | --- | --- | --- | --- | --- | --- |
|  | General cognition | TICS | Episodic memory | Delayed recall | Immediate recall | Visuospatial ability |
| underweight | -0.761 | -0.528 | 0.073 | 0.173 | 0.071 | -0.120* |
|  | 0.619 | 0.352 | 0.258 | 0.318 | 0.235 | 0.070 |
| overweight | 0.728* | 0.309 | 0.371** | 0.391* | 0.316** | 0.018 |
|  | 0.384 | 0.220 | 0.162 | 0.200 | 0.147 | 0.043 |
| obesity | 1.117* | 0.171 | 0.406 | 0.367 | 0.221 | 0.075 |
|  | 0.599 | 0.341 | 0.252 | 0.310 | 0.228 | 0.067 |
| age | 0.212 | 0.464*** | -0.132 | -0.165 | -0.116 | -0.008 |
|  | 0.242 | 0.123 | 0.089 | 0.111 | 0.081 | 0.027 |
| age2 | -0.221 | -0.394*** | 0.051 | 0.065 | 0.048 | 0.001 |
|  | 0.191 | 0.095 | 0.069 | 0.086 | 0.063 | 0.021 |
| male | 1.527*** | 1.249*** | 0.449*** | 0.56*** | 0.337*** | 0.173*** |
|  | 0.290 | 0.169 | 0.124 | 0.153 | 0.112 | 0.032 |
| hukou | -2.027*** | -1.29*** | -0.52*** | -0.722*** | -0.365** | -0.066 |
|  | 0.389 | 0.228 | 0.166 | 0.207 | 0.151 | 0.044 |
| marriage | 1.059*** | 0.505** | 0.584*** | 0.559*** | 0.692*** | 0.029 |
|  | 0.402 | 0.214 | 0.162 | 0.197 | 0.144 | 0.043 |
| education | 1.879*** | 1.163*** | 1.166*** | 1.519*** | 0.897*** | 0.13*** |
|  | 0.436 | 0.289 | 0.206 | 0.260 | 0.189 | 0.050 |
| log(total household income) | 0.352*** | 0.227*** | 0.137*** | 0.145*** | 0.126*** | 0.037*** |
|  | 0.089 | 0.051 | 0.038 | 0.046 | 0.034 | 0.010 |
| household size | -0.147 | -0.080 | -0.119** | -0.114* | -0.118*** | -0.005 |
|  | 0.112 | 0.064 | 0.048 | 0.059 | 0.043 | 0.012 |
| child number | -0.097 | 0.003 | -0.086* | -0.088 | -0.073* | -0.022* |
|  | 0.113 | 0.062 | 0.046 | 0.056 | 0.041 | 0.012 |
| systolic blood | -0.027*** | -0.016*** | -0.011*** | -0.013*** | -0.007** | 0.001 |
|  | 0.010 | 0.006 | 0.004 | 0.005 | 0.004 | 0.001 |
| diastolic blood | 0.029 | 0.013 | 0.009 | 0.008 | 0.009 | -0.003 |
|  | 0.018 | 0.010 | 0.007 | 0.009 | 0.007 | 0.002 |
| waist | -0.013 | 0.004 | 0.003 | 0.008 | 0.005 | -0.001 |
|  | 0.021 | 0.012 | 0.009 | 0.011 | 0.008 | 0.002 |
| disability | -0.895 | -0.877*** | -0.392* | -0.448* | -0.358* | 0.046 |
|  | 0.556 | 0.288 | 0.216 | 0.261 | 0.196 | 0.063 |
| Triglycerides | 0.003 | 0.003 | 0.000 | 0.001 | 0.000 | 0.000 |
|  | 0.003 | 0.002 | 0.001 | 0.002 | 0.001 | 0.000 |
| Total Cholesterol | -0.013 | -0.013 | -0.001 | -0.005 | 0.003 | 0.000 |
|  | 0.014 | 0.008 | 0.006 | 0.008 | 0.006 | 0.002 |
| Glycated Hemoglobin | 0.038 | -0.033 | -0.001 | 0.063 | -0.056 | -0.012 |
|  | 0.133 | 0.075 | 0.056 | 0.070 | 0.049 | 0.015 |
| High Density Lipoprotein Cholesterol | -0.006 | 0.013 | -0.007 | -0.003 | -0.010 | -0.004* |
|  | 0.019 | 0.011 | 0.008 | 0.010 | 0.007 | 0.002 |
| Low Density Lipoprotein Cholesterol | 0.023 | 0.016* | 0.002 | 0.007 | -0.001 | 0.000 |
|  | 0.015 | 0.009 | 0.007 | 0.008 | 0.006 | 0.002 |
| _cons | 2.755 | -10.545** | 7.535** | 8.514** | 6.169** | 1.087 |
|  | 8.003 | 4.165 | 3.044 | 3.781 | 2.758 | 0.894 |
| Observations | 968 | 1353 | 1259 | 1320 | 1292 | 1024 |
| R-squared | 0.193 | 0.184 | 0.207 | 0.191 | 0.182 | 0.114 |

*Notes:*Standard errors are in parentheses. *** p<0.01, ** p<0.05, * p<0.1
